# Supplementary material for: Rapid Screening and Comparison of Chimeric Lysins for Antibacterial Activity against Staphylococcus aureus Strains
Source: MDPI journal article supplement (doi:10.3390/antibiotics12040667), 2023-03-29
Supplement: s1 [file s1]

Supplementary Information

# Rapid Screening and Comparison of Chimeric Lysins for Antibacterial Activity against *Staphylococcus aureus* Strains (Supplementary Information)

Jin-Mi Park <sup>1,2</sup>, Dae-Sung Ko <sup>1,2</sup>, Hee-Soo Kim <sup>1,2</sup>, Nam-Hyung Kim <sup>1,2</sup>, Eun-Kyoung Kim <sup>3</sup>, Young-Hye Roh <sup>3</sup>, Danil Kim <sup>3</sup>, Jae-Hong Kim <sup>1</sup>, Kang-Seuk Choi <sup>2,4,\*</sup> and Hyuk-Joon Kwon <sup>1,2,\*</sup>

<sup>1</sup> Laboratory of Poultry Medicine, College of Veterinary Medicine, Seoul National University, Seoul 08826, Republic of Korea

<sup>2</sup> Research Institute for Veterinary Science, College of Veterinary Medicine, BK21 for Veterinary Science, Seoul 08826, Republic of Korea

<sup>3</sup> Department of Farm Animal Medicine, College of Veterinary Medicine, Seoul National University, Pyeongchang-gu 25354, Republic of Korea

<sup>4</sup> Laboratory of Avian Diseases, College of Veterinary Medicine, Seoul National University, Seoul 08826, Republic of Korea

\* Correspondence: kchoi0608@snu.ac.kr (K.-S.C.); kwonhj01@snu.ac.kr (H.-J.K.); Tel.: +82-2-880-1266 (K.-S.C. & H.-J.K.)

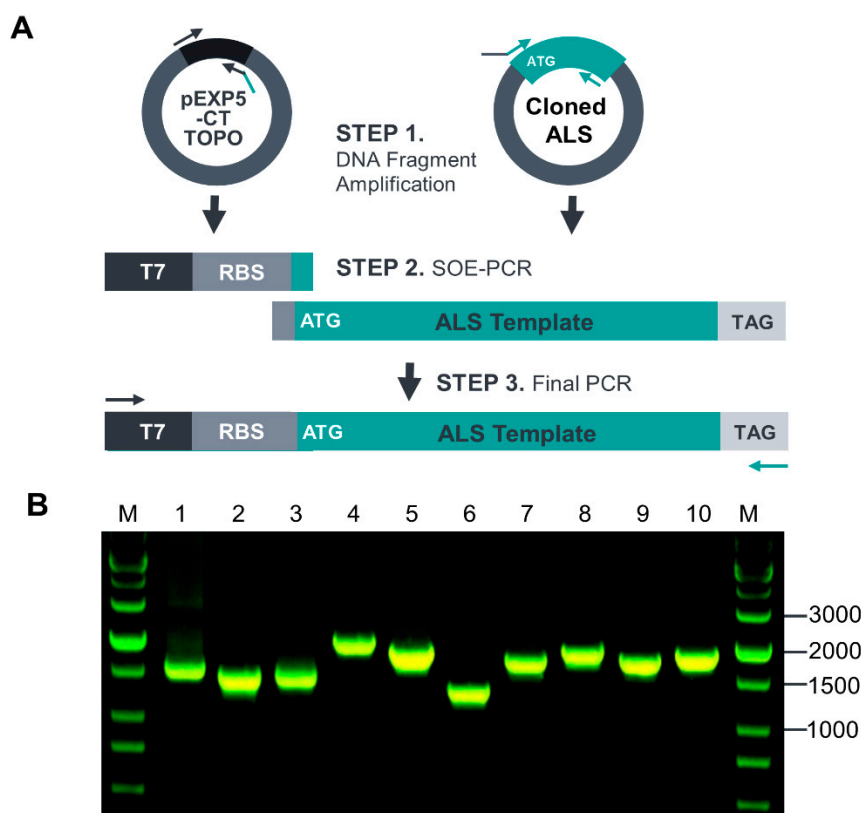

**Figure S1.** Preparation of chimeric lysin DNA template for cell-free expression system by PCR and SOE-PCR. (A) Schematic presentation of SOE-PCR for DNA template preparation and (B) Agarose gel electrophoresis of high-concentration purified DNA template for cell-free expression. Samples (about 400-600 ng/ $\mu$ l) were loaded with 1  $\mu$ l each on 1.3% agarose gel. Lane M, 1000 bp size marker; Lane 1, ALS1 (437ng), 1576bp; Lane 2, ALS2 (548ng), 1429bp; Lane 3, ALS3 (423ng), 1435bp; Lane 4,

ALS4 (483ng), 2032bp; Lane 5, ALS7 (600ng), 1858bp; Lane 6, ALS6 (403ng), 1330bp; Lane 7, ALS7 (420ng), 1671bp; Lane 8, ALS8 (417ng), 1936bp; Lane 9, ALS9 (514ng), 1783bp; Lane 10, ALS10 (518ng), 1879bp.

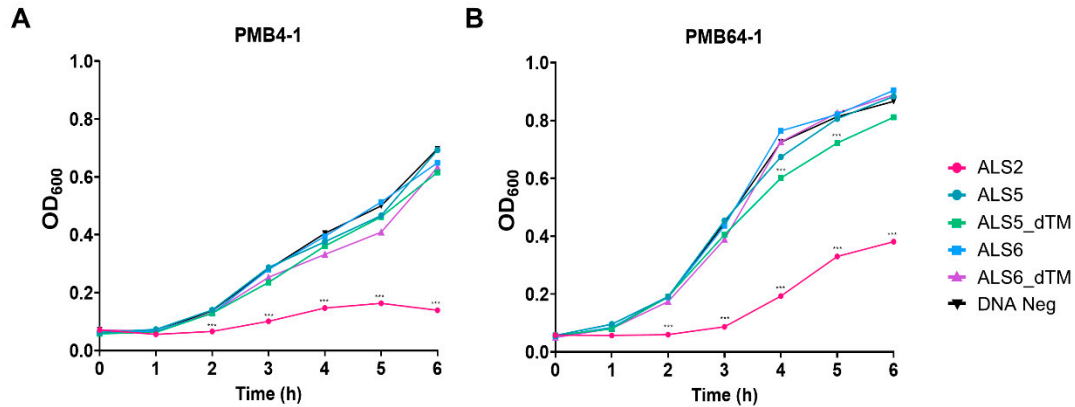

**Figure S2.** Effect of transmembrane peptides on antibacterial activity of ALS5 and ALS6. Antibacterial activity of parents (ALS5 and ALS6) and mutants (ALS5-dTM and ALS6-dTM) without transmembrane peptides were prepared using cell-free expression system and antibacterial activity was tested using turbidity reduction test. Antibacterial activity of chimeric lysins to *S. aureus* strains (A) PMB4-1 and (B) PMB64-1. ALS2 and cell free expression reaction without DNA were used as positive and negative controls. Single experiment was performed in triplicate samples. Data were analyzed by one-way ANOVA followed by Dunnett's test to determine the significance relative to the negative control. ( $p^{***} < 0.001$ ,  $p^{**} < 0.01$ ,  $p^* < 0.05$ ).

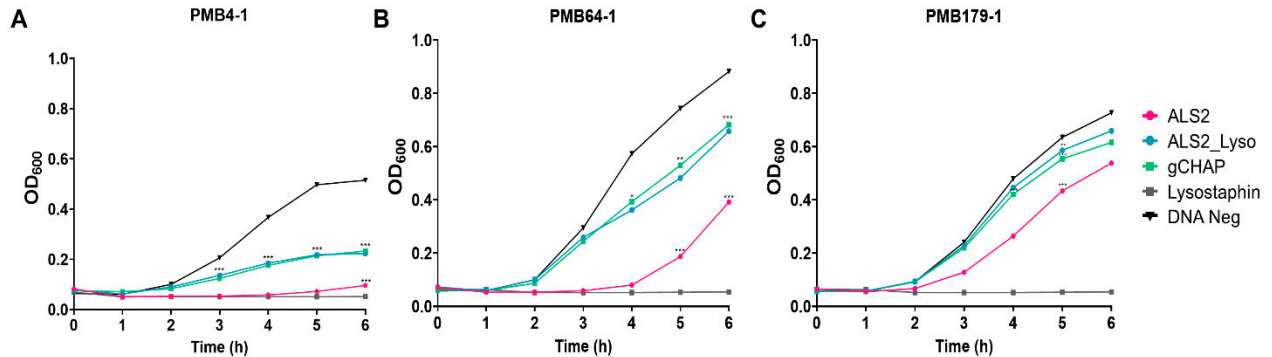

**Figure S3.** Comparison of antibacterial activities of ALS2, ALS2\_Lyso and gCHAP. Antibacterial activity of chimeric lysins to *S. aureus* strains (A) PMB4-1, (B) PMB64-1 and (C) PMB179-1. Lysostaphin and cell free expression reaction without DNA were used as positive and negative controls. Single experiment was performed in triplicate samples. Data were analyzed by one-way ANOVA followed by Dunnett's test to determine the significance relative to the negative control. ( $p^{***} < 0.001$ ,  $p^{**} < 0.01$ ,  $p^* < 0.05$ ).

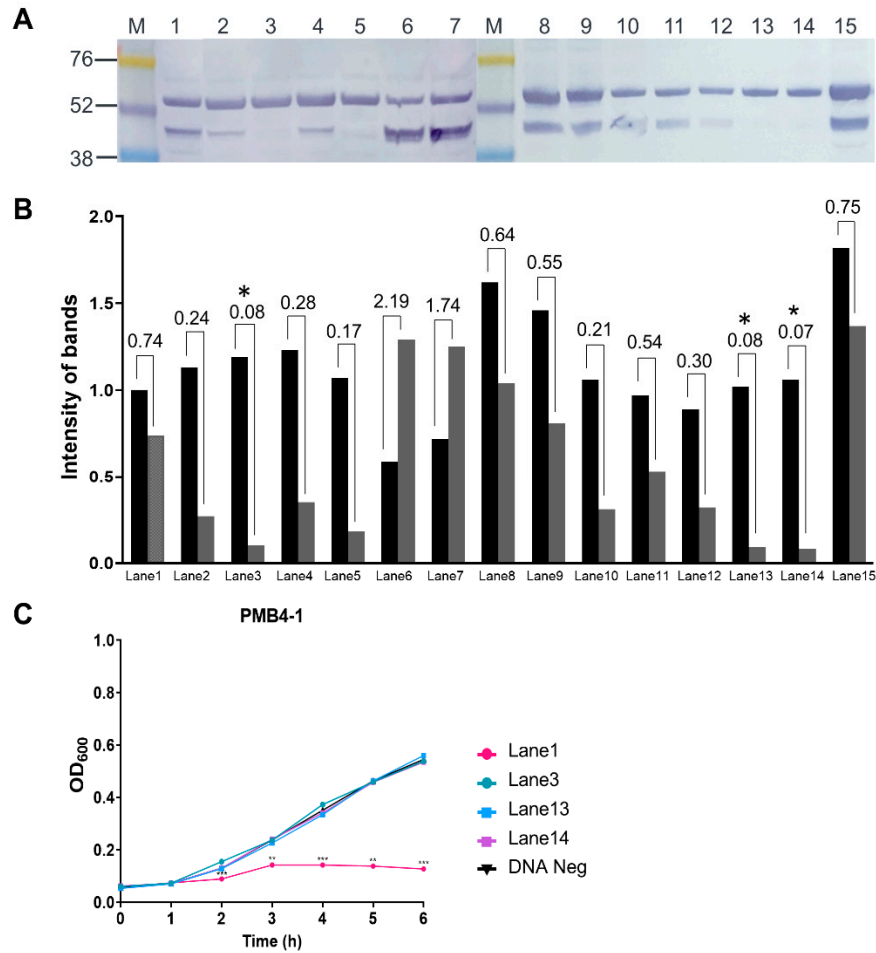

**Figure S4.** Effects of 89<sup>th</sup> methionine mutations on expression of the subprotein and antibacterial activity. (A) Western analysis in ALS2 89<sup>th</sup> amino acid (methionine) mutation. Lane M: protein molecular weight marker (Amersham™ ECL™ Rainbow™ Marker, Lane 1: ALS2 ; Lane 2: ATC (Ile) mutagenesis ; Lane 3: CTG (Leu) mutagenesis ; Lane 4: TTG (Leu) mutagenesis ; Lane 5: GTG (Val) mutagenesis ; Lane 6: ATT (Ile) mutagenesis ; Lane 7: ATA (Ile) mutagenesis ; Lane 8: TGT (Cys) mutagenesis ; Lane 9: TGC (Cys) mutagenesis ; Lane 10: ACT (Thr) mutagenesis ; Lane 11: ACC (Thr) mutagenesis ; Lane 12: ACA (Thr) mutagenesis ; Lane 13: ACG (Thr) mutagenesis ; Lane 14: GGG (Gly) mutagenesis ; Lane 15: GGC (Gly) mutagenesis. (B) The relative protein intensity of ALS2 protein and subprotein according to mutagenesis. Protein expression ratio was presented using Image J compared to ALS2 (52.4kDa). (C) Antibacterial activity of CTG (Leu), ACG (Thr), GGG (Gly) mutants were compared with parent ALS2. Cell free expression reaction without DNA was used as negative controls. Single experiment was performed in triplicate samples. Data were analyzed by one-way ANOVA followed by Dunnett's test to determine the significance relative to the negative control. ( $p^{***} < 0.001$ ,  $p^{**} < 0.01$ ,  $p^* < 0.05$ ).

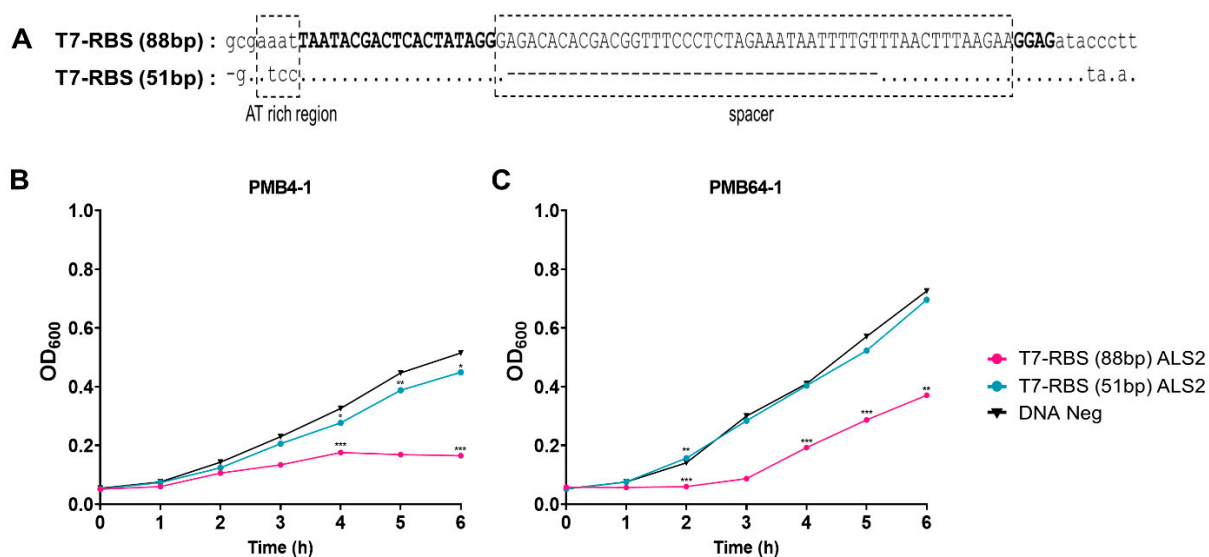

**Figure S5.** Comparison of the present and previous cell-free expression systems. (A) Structure of the present (88bp) and the previous (51bp) T7 promoter and ribosome-binding site (RBS). AT-rich and spacer regions are boxed in broken line and T7 promoter and RBS sequences are in bold. Comparison of antibacterial activities of ALS2 prepared by the present and previous methods in *S. aureus* strains (B) PMB4-1 and (C) PMB64-1. Cell free expression reaction without DNA was used as negative controls. Single experiment was performed in triplicate samples. Data were analyzed by one-way ANOVA followed by Dunnett's test to determine the significance relative to the negative control. ( $p^{***} < 0.001$ ,  $p^{**} < 0.01$ ,  $p^* < 0.05$ ).

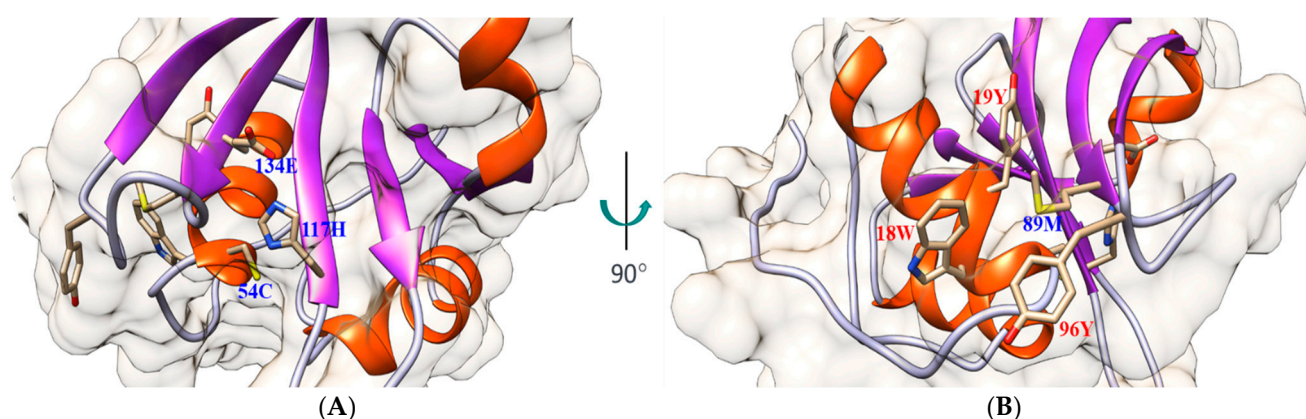

**Figure S6.** Locations of catalytic triad and 89M side chain in the 3D structure of gCHAP (AF-A0A6B5FVD2-F1-model\_v3). (A) Location of catalytic triad (54C, 117H, and 134E). (B) Location of 89M side chain and interaction with neighboring side chains of 18W, 19Y and 96Y.

**Table S1.** Proteins and domains used for chimeric lysin construction.

| Abbreviated name         | Genbank Protein Full name           | Genbank accession No. | Amino acid Region            | Amino acid Length |
|--------------------------|-------------------------------------|-----------------------|------------------------------|-------------------|
| ØK                       | LysK                                | AFN38929              | 1-495                        | 495               |
| gCHAP                    | Secretory antigen SsaA-like protein | ABD29804              | 152-265<br>(Surface antigen) | 114               |
| gAmi                     | Autolysin                           | CYF13637              | 257-385<br>(Ami_2 domain)    | 129               |
| LytM                     | glycine-glycine endopeptidase LytM  | WP_000736798          | 1-316                        | 316               |
| LytH                     | Cell wall amidase lyth              | QBX59665              | 1-291                        | 291               |
| LytD                     | N-acetylglucosaminidase             | WP_000739230          | 1-258                        | 258               |
| SsaA                     | Secretory antigen SsaA-like protein | ABD29804              | 1-265                        | 265               |
| Lysostaphin <sup>a</sup> | lysostaphin<br>(ttg start codon)    | AAA26655.1            | 144-389                      | 246               |

<sup>a</sup> used as a positive sample in the screening test.**Table S2.** PCR primers used for amplification of lysin, autolysin and lysostaphin

| Amplified gene                                       | Primer name | Sequence (5' -3')        | Usage                                 |
|------------------------------------------------------|-------------|--------------------------|---------------------------------------|
| LysK                                                 | phiK CHAP-F | ATGGCAAAGACTCAGGCAGA     | ALS1,3 amplification                  |
|                                                      | phiK CHAP-R | TTCCTTCTTAACAGTAGTACC    | ALS3 amplification                    |
|                                                      | phiK Ami-F  | GCAGGTACTACTGTGAAGAAGG   | ALS2,4,5,10 amplification             |
|                                                      | phiK SH3-F  | GGTACTTCTTCTTCTACTGTC    | ALS3 amplification                    |
|                                                      | phiKL-R     | TTTGAAAACACCCCATGCAAC    | ALS1,2,3,4,5,10 & 5-dTM amplification |
| LysM peptidoglycan-binding domain-containing protein | gCHAP-F     | atgGCATCATCTTTAATCACCAA  | ALS2 amplification                    |
|                                                      | gCHAP-R     | ATGGATGAATGCATAGCTAGA    | ALS2,6,9,10 & 6-dTM amplification     |
| Autolysin (AtIE)                                     | gAmi2-F     | CCTAAATACGCATACCGTAAC    | ALS3 amplification                    |
|                                                      | gAmi2-R     | GTCATATAATTGATCATAACT    | ALS3 amplification                    |
| Glycine-glycine endopeptidase LytM                   | LytM-F      | ATGAAAAAATTAACAGCAGCAGC  | ALS4,8 amplification                  |
|                                                      | LytM-R      | TCTACTTTGCAAGTATGACGTTGG | ALS4,8 amplification                  |
| Cell wall amidase lyth                               | LytH-F      | ATGAAAAAATAGAGGCATGGTT   | ALS6,7,8,9 amplification              |
|                                                      | LytH-R      | CGCAGAAAAATAAATTTTAAG    | ALS6,7,8,9 amplification              |
| N-acetylglucosaminidase                              | LytD-F      | ATGAAGAAGAATTTCAAGTTACG  | ALS5,7 amplification                  |
|                                                      | LytD-R      | TTTATAATATGTTTGTCTAAT    | ALS5,7 amplification                  |
| Secretory antigen SsaA-like protein                  | SsaA-F      | aTGAAAAAATTAGCATTTGCAATA | ALS9,10 amplification                 |

|                                  |        |                       |                           |
|----------------------------------|--------|-----------------------|---------------------------|
| Lysostaphin<br>(ttg start codon) | Lyso-F | atgGCGGCAACGCATGAACAC | Lysostaphin amplification |
|                                  | Lyso-R | TTTGATAGTACCCACAGAAC  | Lysostaphin amplification |

small case letters indicate nucleotides added artificially.

Underlined letters indicate the sequence of T7 and RBS fragments.

**Table S3.** PCR primers used for amplification of DNA templates for cell free expression

| Primer name   | Sequence (5' -3')                                               | Usage                                    |
|---------------|-----------------------------------------------------------------|------------------------------------------|
| T7-F          | GCGAAATTAATACGACTCACTATAG                                       | T7 amplification PCR for all             |
| T7-R          | AAGGGTATCTCCTTCTTAAAGTTAAAC                                     | T7 amplification                         |
| phiKL-TAG-R   | ctaTTTGAAAACACCCCATGCAAC                                        | ALS1,2,3,4,5,10<br>& 5-dTM amplification |
| gCHAP-TAG-R   | ctaATGGATGAATGCATAGCTAGA                                        | ALS6 & 6-dTM amplification               |
| LytD-TAG-R    | ctaTTTATAATATGTTTGTCTAAT                                        | ALS7 amplification                       |
| LytM-TAG-R    | ctaTCTACTTTGCAAGTATGACGTTGG                                     | ALS8 amplification                       |
| LytH-TAG-R    | ctaCGCAGAAAAATAAATTTTAAG                                        | ALS9 amplification                       |
| Lyso-TAG-R    | ctaTTTGATAGTACCCACAGAAC                                         | Lysostaphin amplification                |
| T7-phiKCHAP-F | <u>CTTTAAGAAGGAGATACCCTT</u> ATGGCAA-<br>GACTCAGGCAG            | SOE-PCR for ALS1, ALS3                   |
| T7-phiKCHAP-R | CTGCCTGAGTCTTTGCCATA <u>AAGG-</u><br><u>TATCTCCTTCTTAAAG</u>    | SOE-PCR for ALS1, ALS3                   |
| T7-gCHAP-F    | <u>CTTTAAGAAGGAGATACCCTT</u> ATGG-<br>CATCATCTTTTAATCAC         | SOE-PCR for ALS2                         |
| T7-gCHAP-R    | GTGATTAAAAGATGATGCCATA <u>AAGG-</u><br><u>TATCTCCTTCTTAAAG</u>  | SOE-PCR for ALS2                         |
| T7-LytM-F     | <u>CTTTAAGAAGGAGA-</u><br><u>TACCCTT</u> ATGAAAAAATTAACAGCAGC   | SOE-PCR for ALS4                         |
| T7-LytM-R     | GCTGCTGTTAATTTTTTCATA <u>AAGG-</u><br><u>TATCTCCTTCTTAAAG</u>   | SOE-PCR for ALS4                         |
| T7-LytD-F     | <u>CTTTAAGAAGGAGATACCCTT</u> ATGAAGAA-<br>GAATTCAAGTTAC         | SOE-PCR for ALS5                         |
| T7-LytD-R     | GTAACCTTGAAATTTCTTTCATA <u>AAGG-</u><br><u>TATCTCCTTCTTAAAG</u> | SOE-PCR for ALS5                         |
| T7-LytH-F     | <u>CTTTAAGAAGGAGA-</u><br><u>TACCCTT</u> ATGAAAAAATAGAGGCATG    | SOE-PCR for ALS6,7,8                     |
| T7-LytH-R     | CATGCCTCTATTTTTTCATA <u>AAGG-</u><br><u>TATCTCCTTCTTAAAG</u>    | SOE-PCR for ALS6,7,8                     |
| T7-SsaA-F     | <u>CTTTAAGAAGGAGA-</u><br><u>TACCCTT</u> ATGAAAAAATTAGCATTTGC   | SOE-PCR for ALS9,10                      |
| T7-SsaA-R     | GCAAATGCTAATTTTTTCATA <u>AAGG-</u><br><u>TATCTCCTTCTTAAAG</u>   | SOE-PCR for ALS9,10                      |
| T7-Lyso-F     | <u>CTTTAAGAAGGAGATACCCTT</u> ATGGCGG-<br>CAACGCATGAAC           | SOE-PCR for Lysostaphin                  |
| T7-Lyso-R     | GTCATGCGTTGCCGCCATA <u>AAGG-</u><br><u>TATCTCCTTCTTAAAG</u>     | SOE-PCR for Lysostaphin                  |

small case letters indicate nucleotides added artificially.

Underlined letters indicate the sequence of T7 and RBS fragments.

**Table S4.** PCR primers used for ALS2 mutagenesis.

| Primer name | Location | Modified sequence (5'-3')         | Usage          |
|-------------|----------|-----------------------------------|----------------|
| GAT81GAC-F  | 229-255  | CGTGTCATGGTGACGGTAGTATCTTG        | TS-10 mutation |
| GAT81GAC-R  | 229-255  | CAAGATACTACCGTCACCATGACACG        | TS-10 mutation |
| GCT73GCC-F  | 203-234  | CATATGGTCATGTTGCCTACGTTGAACGTGTC  | TS-34 mutation |
| GCT73GCC-R  | 203-234  | GACACGTTCAACGTAGGCAACATGACCATATG  | TS-34 mutation |
| TAT74TAC-F  | 208-238  | GGTCATGTTGCCTACGTTGAACGTGTCAATG   | TS-31 mutation |
| TAT74TAC-R  | 208-238  | CATTGACACGTTCAACGTAGGCAACATGACC   | TS-31 mutation |
| GAA88TAA-F  | 245-277  | GTAGTATCTTGATTCTTAAATGAATTACACAT  | STOP mutation  |
| GAA88TAA-R  | 245-277  | ATGTGTAATTCATTTAAGAAATCAAGATACTAC | STOP mutation  |

**Table S5.** PCR primers used for transmembrane region deletion.

| Primer name   | Sequence (5' -3')                                                          | Usage                  |
|---------------|----------------------------------------------------------------------------|------------------------|
| ALS5-dTM_F    | atgGTGAATGAACTAAATTGTTTAAAAAT                                              | ALS5-dTM amplification |
| ALS6-dTM_F    | atgAATAGCAATAGTGAAGATAGTGGAAC                                              | ALS6-dTM amplification |
| T7-ALS5-dTM_F | <u>CTTTAAGAAGGAGA-</u><br><u>TACCCTTATGGTGAATGAACTAAATT-</u><br>GTTTAAAAAT | SOE-PCR for ALS5-dTM   |
| T7-ALS6-dTM_F | <u>CTTTAAGAAGGAGATACCCTTATGAA-</u><br>TAGCAATAGTGAAGATAGTGGAAC             | SOE-PCR for ALS6-dTM   |

**Table S6.** PCR primers used for mutagenesis of ALS2 89 th amino acid (methionine).

| Primer name      | Modified sequence (5'-3')                       | Amino acid change |
|------------------|-------------------------------------------------|-------------------|
| gCHAP-ATG89ATC-F | CTTGATTCTGAAAT <u>C</u> AATTACACATATGGTCC       | Isoleucine        |
| gCHAP-ATG89ATC-R | GGACCATATGTGTAATT <u>G</u> ATTTTCAGAAATCAAG     | Isoleucine        |
| gCHAP-ATG89CTG-F | GTATCTTGATTCTGAA <u>C</u> TGAATTACACATATGGTCC   | leucine           |
| gCHAP-ATG89CTG-R | GGACCATATGTGTAATTCAG <u>T</u> TCAGAAATCAAGATAC  | leucine           |
| gCHAP-ATG89TTG-F | GTATCTTGATTCTGAA <u>T</u> TGAATTACACATATGGTC    | leucine           |
| gCHAP-ATG89TTG-R | GACCATATGTGTAATTCA <u>A</u> TTTCAGAAATCAAGATAC  | leucine           |
| gCHAP-ATG89GTG-F | GTATCTTGATTCTGAA <u>G</u> TGAATTACACATATGGTC    | valine            |
| gCHAP-ATG89GTG-R | GACCATATGTGTAATTCAC <u>T</u> TCAGAAATCAAGATAC   | valine            |
| gCHAP-ATG89ATT-F | CTTGATTCTGAAAT <u>I</u> AATTACACATATGGTCC       | Isoleucine        |
| gCHAP-ATG89ATT-R | GGACCATATGTGTAATT <u>A</u> ATTTTCAGAAATCAAG     | Isoleucine        |
| gCHAP-ATG89ATA-F | CTTGATTCTGAAAT <u>A</u> AATTACACATATGGTCC       | Isoleucine        |
| gCHAP-ATG89ATA-R | GGACCATATGTGTAATT <u>I</u> ATTTTCAGAAATCAAG     | Isoleucine        |
| gCHAP-ATG89TGT-F | GTATCTTGATTCTGAA <u>I</u> GTAATTACACATATGGTCC   | cysteine          |
| gCHAP-ATG89TGT-R | GGACCATATGTGTAATTAC <u>A</u> TTTCAGAAATCAAGATAC | cysteine          |
| gCHAP-ATG89TGC-F | GTATCTTGATTCTGAA <u>I</u> GCAATTACACATATGGTCC   | cysteine          |
| gCHAP-ATG89TGC-R | GGACCATATGTGTAATTG <u>C</u> ATTTCAGAAATCAAGATA  | cysteine          |
| gCHAP-ATG89ACT-F | GTATCTTGATTCTGAA <u>A</u> CTAATTACACATATGGTCC   | threonine         |
| gCHAP-ATG89ACT-R | GGACCATATGTGTAATTAG <u>T</u> TTTCAGAAATCAAGATAC | threonine         |

---

|                  |                                                 |           |
|------------------|-------------------------------------------------|-----------|
| gCHAP-ATG89ACC-F | GTATCTTGATTTCTGAAAC <u>C</u> AATTACACATATGGTCC  | threonine |
| gCHAP-ATG89ACC-R | GGACCATATGTGTAATT <u>G</u> GTTTCAGAAATCAAGATAC  | threonine |
| gCHAP-ATG89ACA-F | GTATCTTGATTTCTGAAAC <u>A</u> AATTACACATATGGTCC  | threonine |
| gCHAP-ATG89ACA-R | GGACCATATGTGTAATT <u>T</u> GTTTCAGAAATCAAGATAC  | threonine |
| gCHAP-ATG89ACG-F | GTATCTTGATTTCTGAAAC <u>G</u> AATTACACATATGGTCC  | threonine |
| gCHAP-ATG89ACG-R | GGACCATATGTGTAATT <u>C</u> GTTTCAGAAATCAAGATAC  | threonine |
| gCHAP-ATG89GGG-F | GTATCTTGATTTCTGAAG <u>G</u> GGAATTACACATATGGTCC | glycine   |
| gCHAP-ATG89GGG-R | GGACCATATGTGTAATT <u>C</u> CCTTCAGAAATCAAGATAC  | glycine   |
| gCHAP-ATG89GGC-F | GTATCTTGATTTCTGAAG <u>G</u> C AATTACACATATGGTCC | glycine   |
| gCHAP-ATG89GGC-R | GGACCATATGTGTAATT <u>G</u> CCTTCAGAAATCAAGATAC  | glycine   |

---

Underlined letters indicate nucleotides modified by mutagenesis.
